# Supplementary material for: UMI-linked consensus sequencing enables phylogenetic analysis of directed evolution
Source: PubMed Central journal article supplement (PMC7691348; doi:10.1038/s41467-020-19687-9), 2020-11-26
Supplement: 41467_2020_19687_MOESM2_ESM.pdf [file 41467_2020_19687_MOESM2_ESM.pdf]

**Title:** Supplementary Data 1:

**Description:** Final consensus sequences in FASTA format.

**Title:** Supplementary Data 2:

**Description:** Identified mutations with read counts per round of directed evolution.
